# Supplementary material
Source: publisher site journal article supplement (http://www.kjim.org/upload/media/kjim-2022-100-suppl1.pdf)
Supplement: Supplementary file 1 [file kjim-2022-100-suppl1.pdf]

**Supplementary Table 1. Summary of patients' characteristics and treatment details**

| Patient no. | Age, yr | Sex    | Tumor grade | Metastatic sites                 | Previous treatment             | Ki-67 index, % | Cycles of CAPTEM | Temozolomide dose, mg | Capcitabine dose, mg | Best response | OS, mo | PFS, mo |
|-------------|---------|--------|-------------|----------------------------------|--------------------------------|----------------|------------------|-----------------------|----------------------|---------------|--------|---------|
| 1           | 42      | Female | NET, grade2 | Liver                            | -                              | 3              | 46               | 300                   | 1,000                | PR            | 65.3   | 54.17   |
| 2           | 59      | Male   | NET, grade2 | Liver                            | -                              | 8              | 2                | 300                   | 1,150                | SD            | 44.5   | 44.5    |
| 3           | 38      | Male   | NET, grade2 | Liver, lymph node                | -                              | 12             | 5                | 300                   | 1,150                | SD            | 8.97   | 3.57    |
| 4           | 66      | Female | NET, grade2 | Liver                            | Surgery                        | 6.76           | 7                | 300                   | 1,000                | PR            | 7.07   | 7.07    |
| 5           | 49      | Female | NET, grade2 | Liver, lymph node                | -                              | 4              | 10               | 300                   | 1,150                | SD            | 41.17  | 10.47   |
| 6           | 72      | Male   | NET, grade2 | Liver, lymph node, mediastinum   | -                              | 5              | 25               | 300                   | 1,150                | SD            | 41.43  | 39.7    |
| 7           | 63      | Male   | NET, grade3 | Liver                            | Surgery, TACE                  | 40             | 3                | 300                   | 1,150                | PD            | 31.47  | 2.37    |
| 8           | 74      | Female | NET, grade3 | Lymph node, bone                 | Chemotherapy (EP, IP)          | 88.5           | 2                | 300                   | 1,300                | PD            | 15.87  | 2.77    |
| 9           | 60      | Female | NET, grade3 | Liver                            | Surgery                        | 30             | 21               | 300                   | 1,150                | PR            | 23.73  | 23.73   |
| 10          | 51      | Female | NEC         | Liver, lymph node                | Surgery, chemotherapy (EP, IP) | 90             | 5                | 350                   | 1,300                | PR            | 11.2   | 4.6     |
| 11          | 69      | Female | NEC         | Liver, lymph node, adrenal gland | Chemotherapy (EP, IP)          | 80             | 2                | 300                   | 1,500                | PD            | 3.23   | 2.07    |
| 12          | 67      | Male   | NEC         | Liver, lymph node, peritoneum    | Surgery, chemotherapy (EP)     | 40             | 4                | 370                   | 1,300                | SD            | 5.47   | 3.73    |

CAPTEM, capecitabine and temozolomide; OS, overall survival; PFS, progression-free survival; NET, neuroendocrine tumor; PR, partial response; SD, stable disease; TACE, transarterial chemoembolization; PD, progressive disease; EP, etoposide+ cisplatin chemotherapy; IP, irinotecan+ cisplatin chemotherapy; NEC, neuroendocrine carcinoma.
